# Supplementary material
Source: PubMed Central journal article supplement (PMC6532067)
Supplement: NIHMS1013134-supplement-Supplements.pdf [file NIHMS1013134-supplement-Supplements.pdf]

## SUPPLEMENTARY FIGURE 1

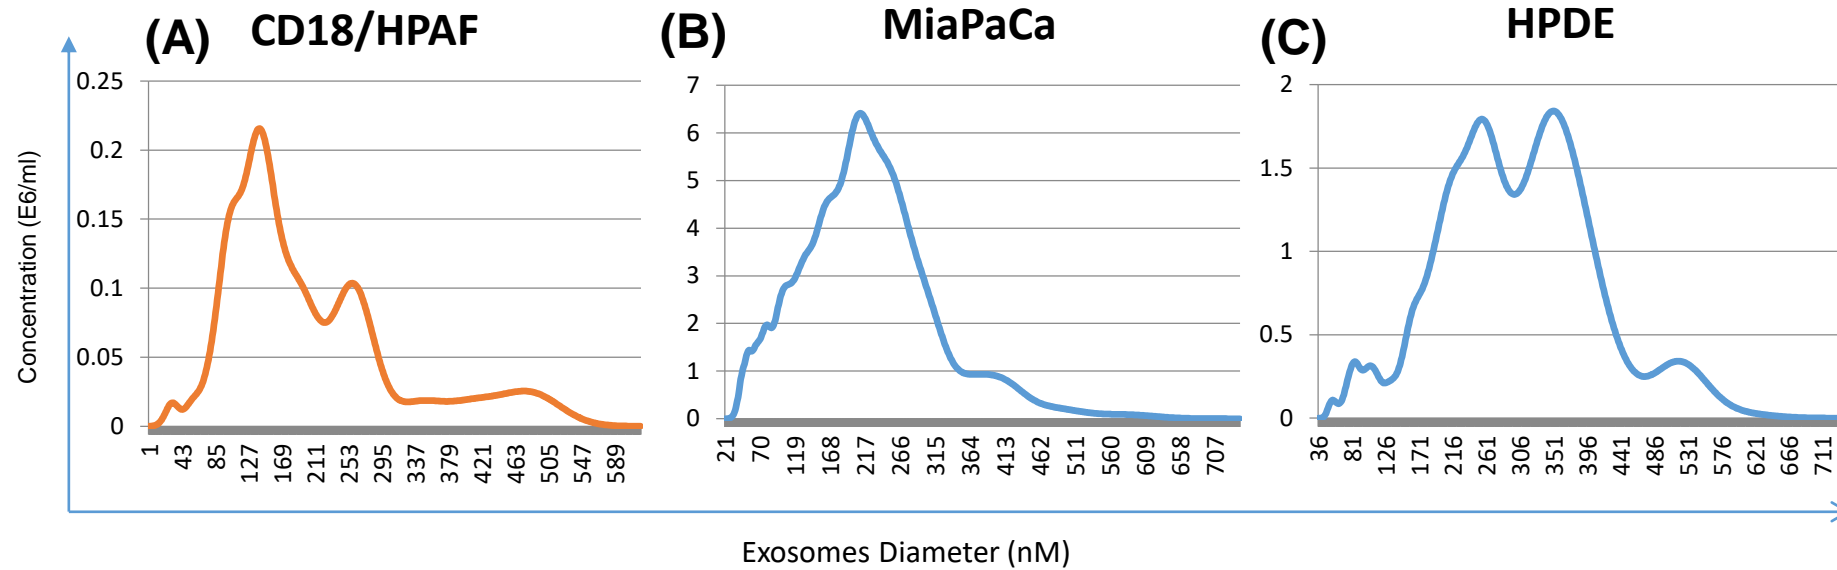

**Supplemental Figure 1:** NTA data for exosomes purified from (a) CD18/HPAF & (b) MiaPaCa pancreatic cancer cell lines and (c) HPDE pancreatic epithelial cell line. The y axis units are expressed  $\times 10^8$  and the x-axis is particle size in nM.

## SUPPLEMENTARY FIGURE 2

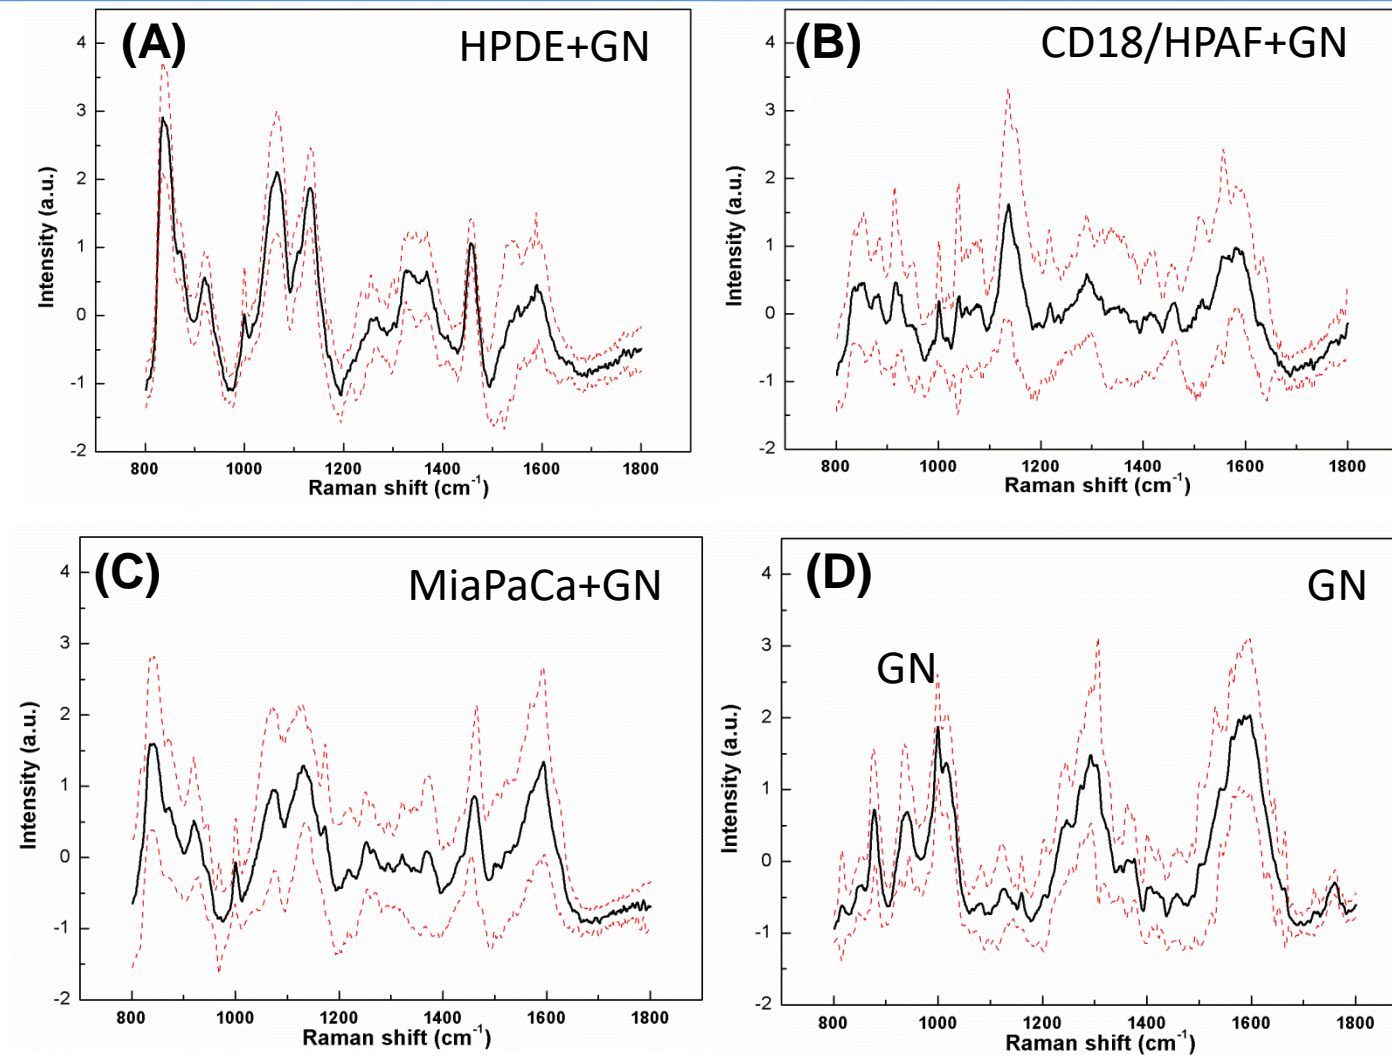

**Supplemental Figure 2:** Averaged SERS spectra for each sample type +/- standard deviation.

## SUPPLEMENTARY FIGURE 3

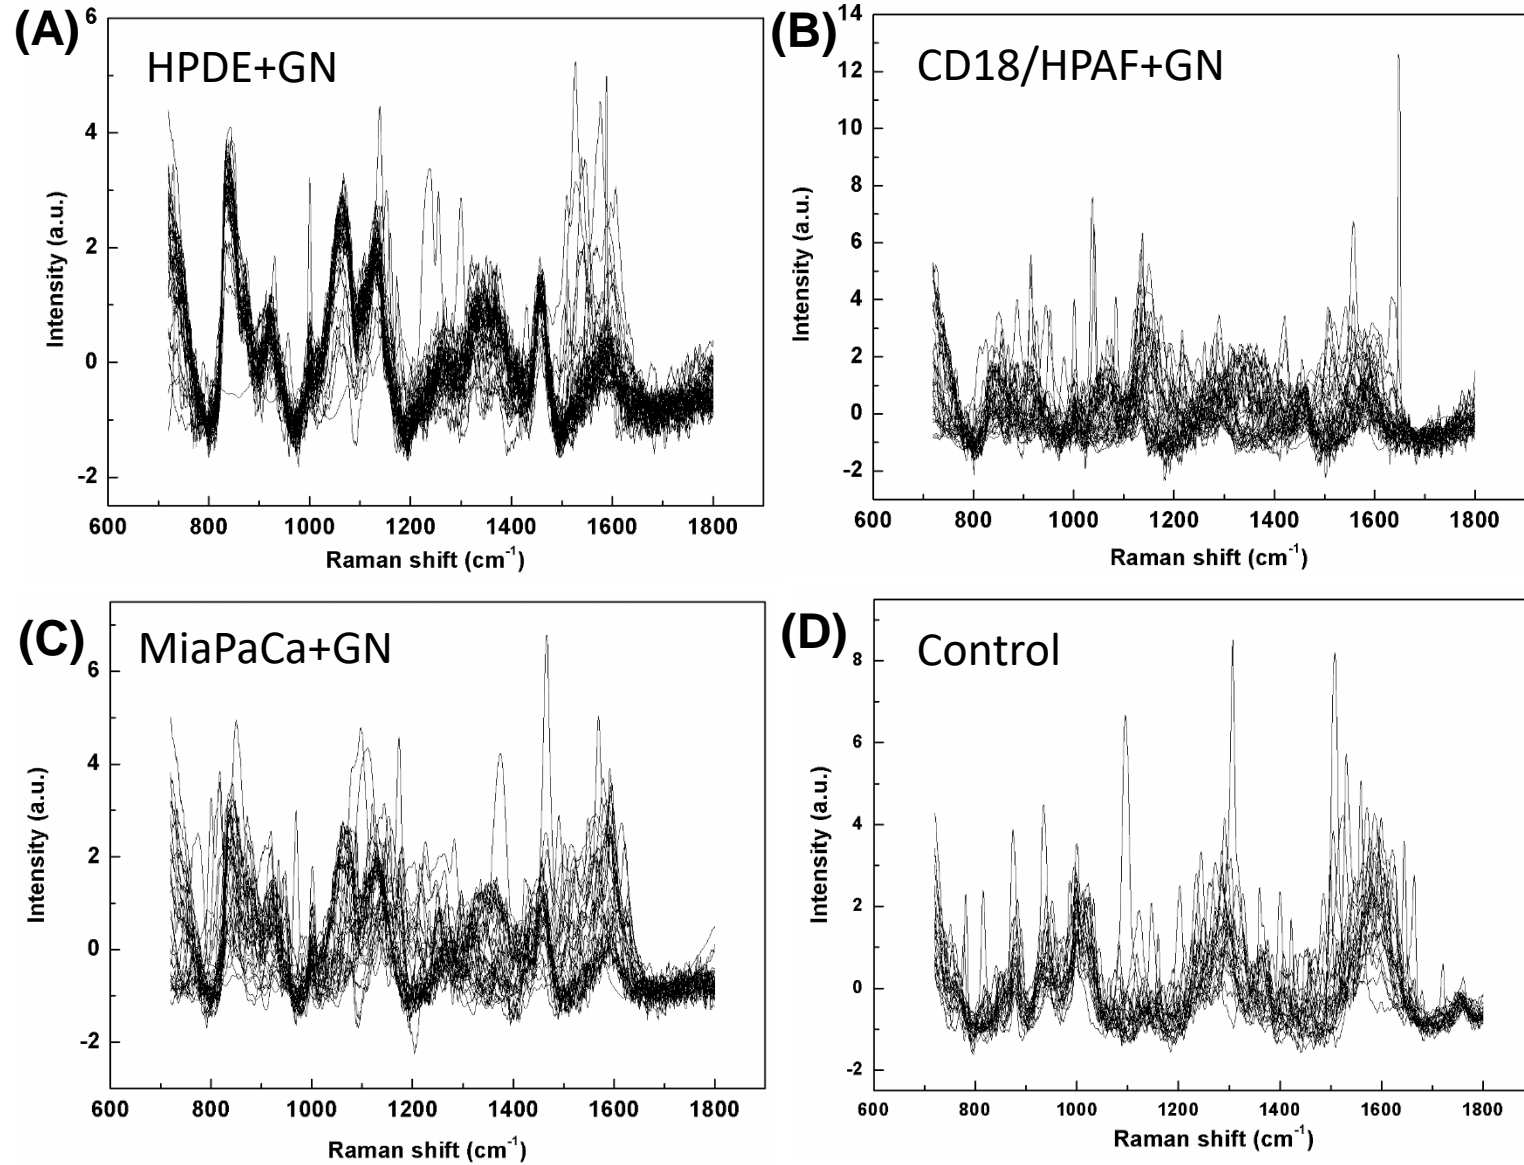

**Supplemental Figure 3:** (a)-(d) All of pre-processed SERS data for each sample population for use in PC-DFA.

## SUPPLEMENTARY FIGURE 4

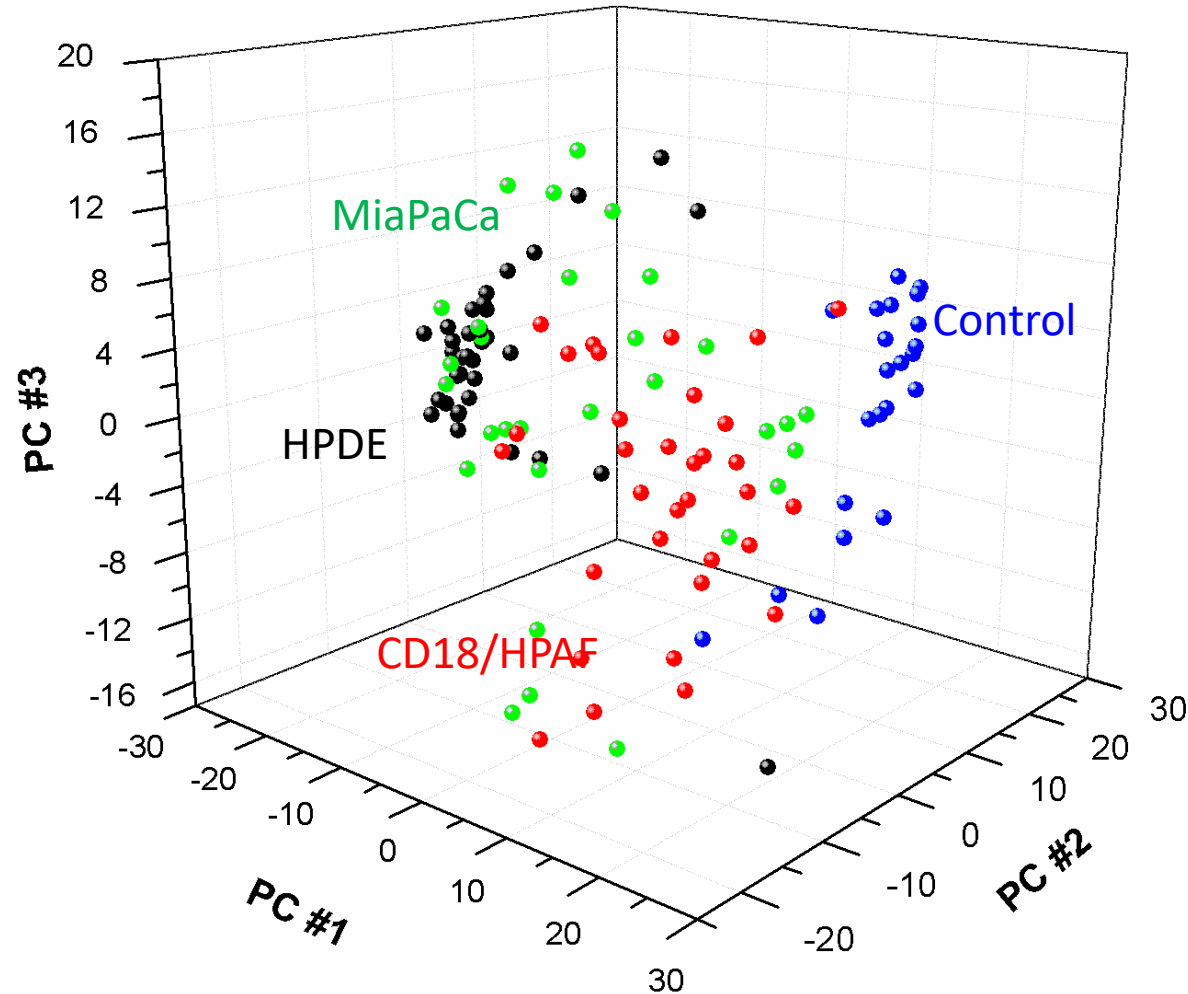

**Supplemental Figure 4:** 3D PCA plot showing exosome population clusters for first three PCs. PCA was used to reduce the number of variables considered from 1004 variables to 20 PCs which counted for 88.2% of the total variance. These 20 PCs were then utilized as the input independent variables for DFA.

## SUPPLEMENTARY FIGURE 5

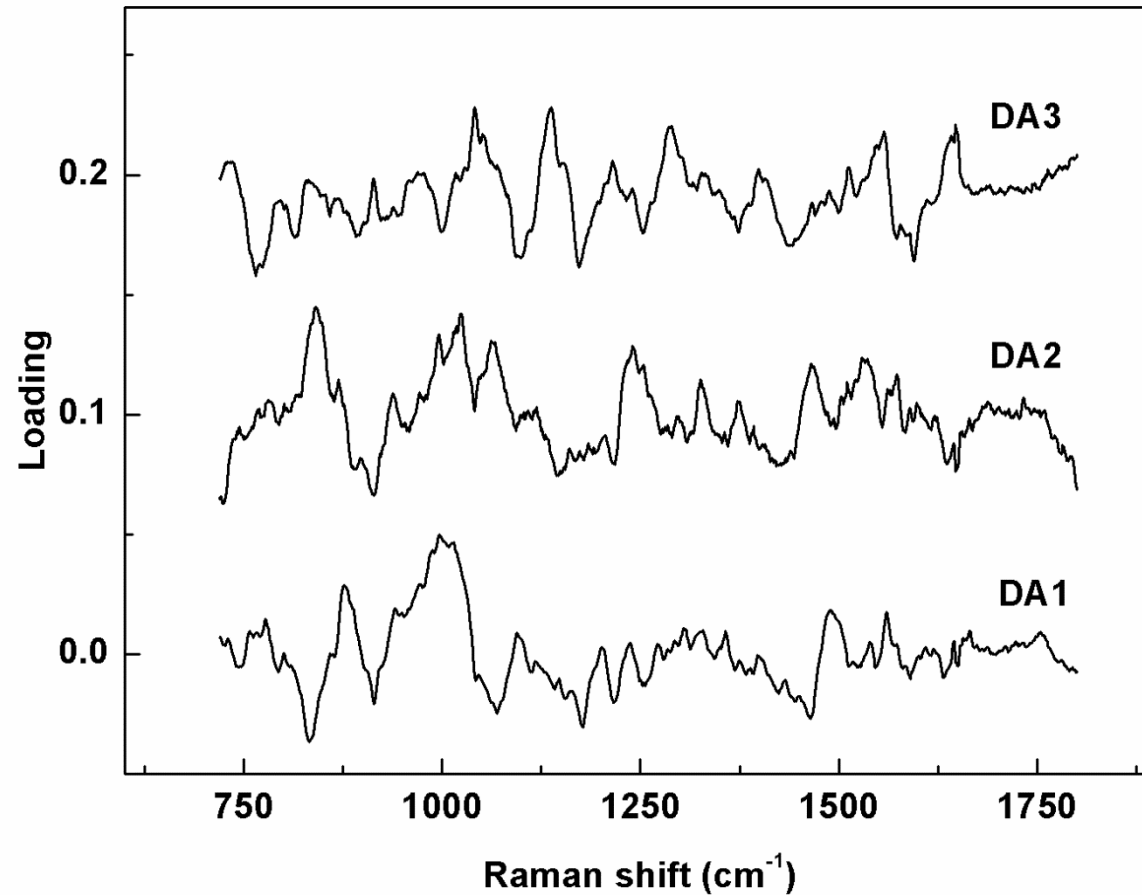

**Supplementary Figure 5:** Corresponding loading spectra for all three PC-DFA loadings to classify the three exosome groups and control group.
